# Supplementary material for: Novel high-efficiency near-infrared phosphor CaZrTaGaO 7 :Cr 3+ and its application in night vision and anti-counterfeiting
Source: Royal Society of Chemistry journal article supplement (doi:10.1039/d4qm00558a), 2024-01-01
Supplement: d4qm00558a1.pdf [file d4qm00558a1.pdf]

### Supporting Information

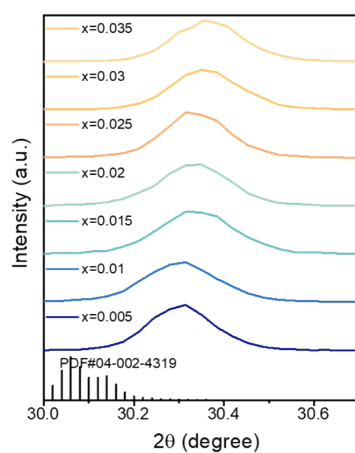

**Fig. S1.** Magnified diffraction patterns of  $\text{CaZrTaGaO}_7:x\text{Cr}^{3+}$  in the region of  $30.0^\circ$ - $30.5^\circ$ .

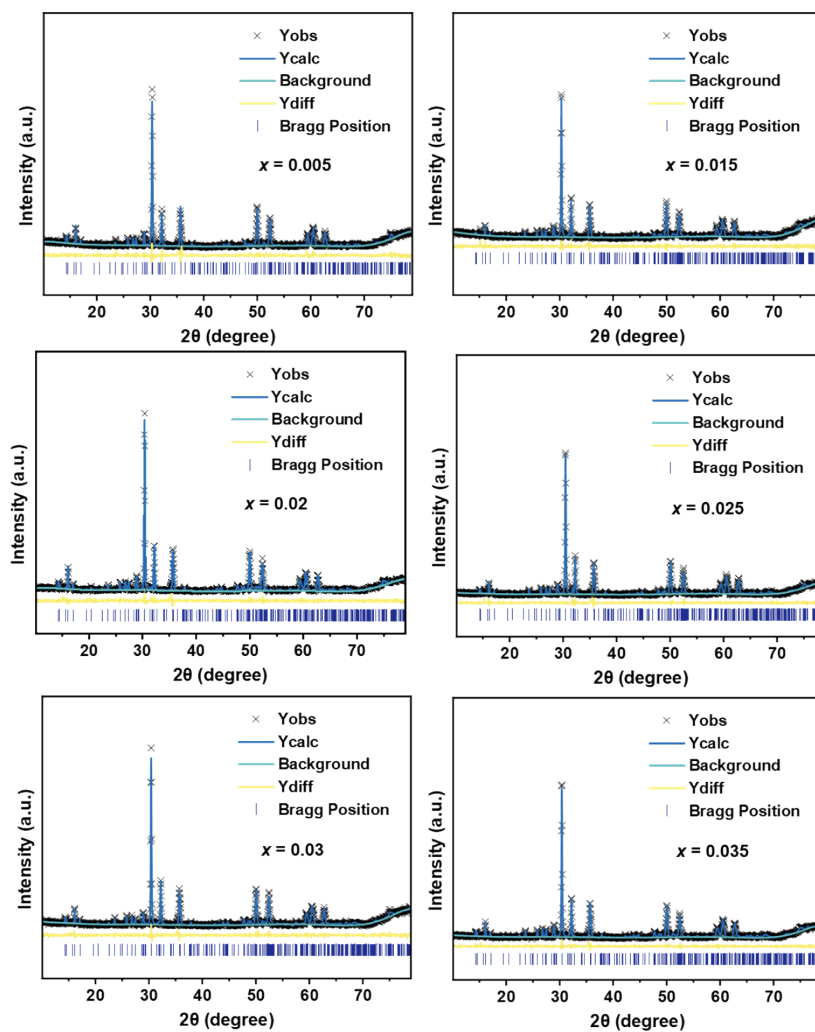

**Fig. S2.** Rietveld refinement results of  $\text{CaZrTaGaO}_7:x\text{Cr}^{3+}$  ( $x = 0.005$ - $0.035$ ).

**Table S1.** Lattice structure, lattice parameters and refinement factors for  $\text{CaZrTaGaO}_7:x\text{Cr}^{3+}$  ( $x = 0.005\text{-}0.035$ ) samples based on the Rietveld refinement XRD patterns.

| $\text{Cr}^{3+}$ concentration | $\chi^2$ | $R_p$ | $R_{wp}$ | a       | b      | c       | V                      |
|--------------------------------|----------|-------|----------|---------|--------|---------|------------------------|
| 0.005                          | 1.949    | 7.34% | 9.65%    | 12.709Å | 7.362Å | 11.458Å | 1051.77 Å <sup>3</sup> |
| 0.01                           | 1.550    | 5.87% | 7.70%    | 12.707Å | 7.360Å | 11.450Å | 1051.37Å <sup>3</sup>  |
| 0.015                          | 1.360    | 6.57% | 8.76%    | 12.687Å | 7.354Å | 11.431Å | 1046.11Å <sup>3</sup>  |
| 0.02                           | 1.458    | 5.64% | 7.69%    | 12.682Å | 7.350Å | 11.427Å | 1046.01Å <sup>3</sup>  |
| 0.025                          | 1.510    | 6.12% | 8.34%    | 12.679Å | 7.349Å | 11.426Å | 1045.62Å <sup>3</sup>  |
| 0.03                           | 1.330    | 6.02% | 8.09%    | 12.675Å | 7.348Å | 11.426Å | 1045.13Å <sup>3</sup>  |
| 0.035                          | 1.515    | 5.79% | 7.70%    | 12.676Å | 7.347Å | 11.423Å | 1044.89Å <sup>3</sup>  |

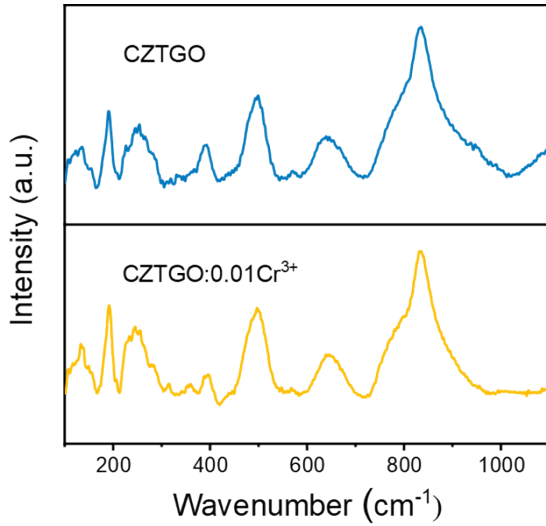

**Fig. S3.** Raman spectra of CZTGO and CZTGO:0.01Cr<sup>3+</sup>.

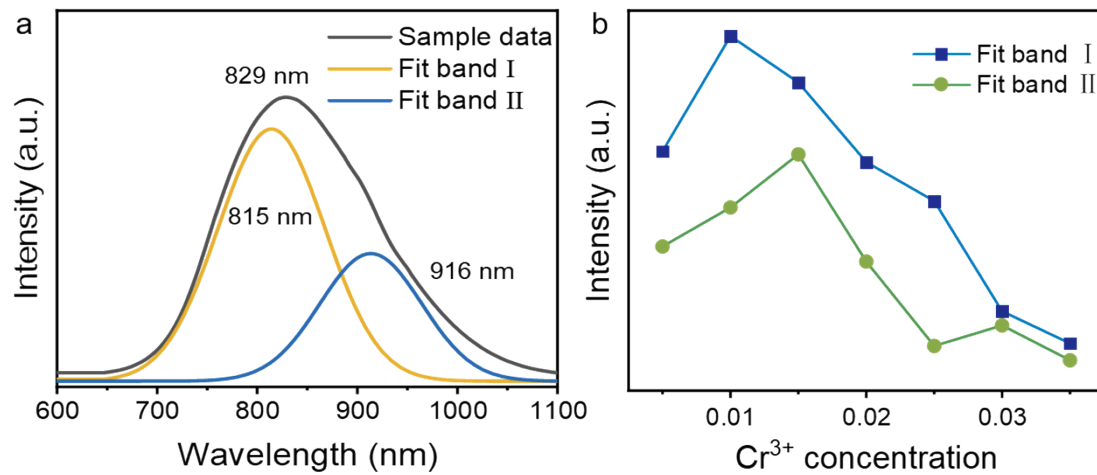

**Fig. S4.** (a) Gaussian fitting for PL spectra of CZTGO:0.01Cr<sup>3+</sup>. (b) Emission intensities of the two fitting band (815 and 916 nm) with Cr<sup>3+</sup> concentrations.

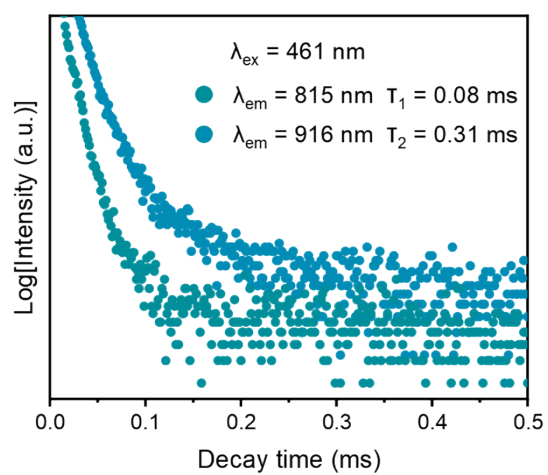

**Fig. S5.** Decay curves of  $\text{CaZrTaGaO}_7:0.01\text{Cr}^{3+}$  ( $\lambda_{\text{ex}} = 461 \text{ nm}$ ,  $\lambda_{\text{em}} = 819 \text{ nm}$  and  $866 \text{ nm}$ ).
